# Supplementary material for: Sources of skill in lake temperature, discharge and ice-off seasonal forecasting tools
Source: Copernicus journal article supplement (doi:10.5194/hess-27-1361-2023), 2023-03-29
Supplement: Supplementary file 1 [file hess-27-1361-2023-supplement.pdf]

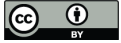

*Supplement of*

## **Sources of skill in lake temperature, discharge and ice-off seasonal forecasting tools**

**François Clayer et al.**

*Correspondence to:* François Clayer ([francois.clayer@niva.no](mailto:francois.clayer@niva.no))

The copyright of individual parts of the supplement might differ from the article licence.

You can find all the codes and data files related to this manuscript at:  
[https://github.com/NIVANorge/seasonal\\_forecasting\\_watexr](https://github.com/NIVANorge/seasonal_forecasting_watexr)

**Table S1: Time series of observations available at each case-study. Note: Temperature is lake water temperature and N is the number of seasons with data (out of 91 seasons).**

| Site      | Variable    | Start | End  | S  | Sampling season | Frequency           |
|-----------|-------------|-------|------|----|-----------------|---------------------|
| Norway    | Discharge   | 1994  | 2016 | 91 | Year-round      | Daily               |
|           | Temperature | 2005  | 2015 | 33 | Apr-Oct         | Monthly             |
| Spain     | Discharge   | 1994  | 2016 | 91 | Year-round      | Daily               |
|           | Temperature | 1997  | 2016 | 72 | Year-round      | Weekly-<br>Monthly  |
| Australia | Discharge   | 2003  | 2013 | 43 | Year-round      | Daily               |
|           | Temperature | 2006  | 2016 | 20 | Year-round      | Daily (irregular)   |
| Germany   | Discharge   | 1994  | 2016 | 91 | Year-round      | Daily               |
|           | Temperature | 1994  | 2016 | 90 | Year-round      | Weekly-<br>biweekly |

**Table S2: Verification statistics (NSE, R<sup>2</sup>, RMSE/sd, bias) for Lake\_PO for each case-study for each season. The percentage of seasons (S), months (M) and days (D) covered by observations is also given as “Obs coverage”. Statistics are calculated on daily data. RMSE/sd is the root-mean squared error divided by one standard deviation.**

|           |                     |     | Obs coverage |     |      | NSE   | R <sup>2</sup> | RMSE/sd | bias  |
|-----------|---------------------|-----|--------------|-----|------|-------|----------------|---------|-------|
|           |                     |     | S            | M   | D    |       |                |         |       |
| Norway    | Discharge           | WI  | 100          | 100 | 93   | 0.46  | 0.47           | 0.73    | 0.15  |
|           |                     | SP  | 100          | 96  | 93   | 0.40  | 0.41           | 0.77    | -1.02 |
|           |                     | SU  | 100          | 100 | 96   | 0.05  | 0.43           | 0.97    | 2.75  |
|           |                     | AU  | 100          | 100 | 95   | 0.57  | 0.66           | 0.66    | -3.13 |
|           | Surface Temperature | WI  | 0            |     |      | -     | -              | -       | -     |
|           |                     | SP  | 48           | 48  | 5    | 0.87  | 0.92           | 0.36    | 0.53  |
|           |                     | SU  | 48           | 48  | 11   | 0.67  | 0.81           | 0.57    | 0.38  |
|           |                     | AU  | 48           | 48  | 5    | 0.81  | 0.99           | 0.43    | -1.03 |
|           | Bottom Temperature  | WI  | 0            |     |      | -     | -              | -       | -     |
|           |                     | SP  | 43           | 39  | 4    | 0.53  | 0.7            | 0.68    | -0.65 |
|           |                     | SU  | 43           | 39  | 10   | 0.37  | 0.60           | 0.79    | 0.84  |
|           |                     | AU  | 43           | 39  | 5    | 0.80  | 0.92           | 0.44    | -0.58 |
| Ice-on    |                     | 100 | -            | -   | 0.97 | 0.99  | 0.16           | 1.8     |       |
| Ice-off   |                     | 100 | -            | -   | 0.36 | 0.76  | 1.09           | -14.7   |       |
| Spain     | Discharge           | WI  | 100          | 100 | 99   | 0.69  | 0.69           | 0.56    | -0.63 |
|           |                     | SP  | 100          | 100 | 99   | 0.54  | 0.57           | 0.38    | -3.15 |
|           |                     | SU  | 100          | 100 | 98   | 0.37  | 0.40           | 0.80    | -1.53 |
|           |                     | AU  | 100          | 100 | 98   | 0.60  | 0.63           | 0.63    | -0.73 |
|           | Surface Temperature | WI  | 77           | 45  | 3    | 0.76  | 0.77           | 0.48    | 0.12  |
|           |                     | SP  | 83           | 65  | 4    | 0.81  | 0.88           | 0.43    | -0.90 |
|           |                     | SU  | 78           | 30  | 3    | 0.60  | 0.66           | 0.62    | -0.45 |
|           |                     | AU  | 87           | 70  | 4    | 0.82  | 0.92           | 0.42    | -1.28 |
|           | Bottom Temperature  | WI  | 27           | 5   | 2    | 0.38  | 0.40           | 0.76    | 0.06  |
|           |                     | SP  | 48           | 17  | 3    | -0.27 | 0.26           | 1.10    | 0.07  |
|           |                     | SU  | 48           | 4   | 2    | 0.48  | 0.55           | 0.70    | -0.25 |
|           |                     | AU  | 35           | 4   | 3    | -0.72 | 0.00           | 1.27    | -0.38 |
| Germany   | Discharge           | WI  | 100          | 100 | 100  | 0.62  | 0.63           | 0.62    | 0.04  |
|           |                     | SP  | 100          | 100 | 100  | 0.61  | 0.68           | 0.62    | -1.08 |
|           |                     | SU  | 100          | 100 | 100  | -0.06 | 0.35           | 1.03    | -0.51 |
|           |                     | AU  | 100          | 100 | 100  | 0.35  | 0.58           | 0.80    | 1.00  |
|           | Surface Temperature | WI  | 95           | 41  | 3    | -0.22 | 0.50           | 1.09    | -0.36 |
|           |                     | SP  | 100          | 96  | 6    | 0.92  | 0.95           | 0.28    | 0.61  |
|           |                     | SU  | 100          | 100 | 7    | 0.51  | 0.89           | 0.70    | 1.24  |
|           |                     | AU  | 100          | 96  | 6    | 0.92  | 0.97           | 0.27    | -0.24 |
|           | Bottom Temperature  | WI  | 95           | 41  | 3    | 0.59  | 0.66           | 0.64    | 0.15  |
|           |                     | SP  | 100          | 96  | 6    | -0.46 | 0.72           | 1.20    | 1.28  |
|           |                     | SU  | 100          | 100 | 7    | -1.04 | 0.75           | 1.42    | 3.54  |
|           |                     | AU  | 100          | 96  | 5    | 0.50  | 0.90           | 0.70    | 1.01  |
| Australia | Discharge           | WI  | 50           | 47  | 97   | -1.69 | 0.01           | 1.64    | -1.02 |
|           |                     | SP  | 48           | 48  | 100  | -6.22 | 0.04           | 2.69    | -0.16 |
|           |                     | SU  | 48           | 43  | 93   | -0.12 | 0.15           | 1.06    | 0.48  |
|           |                     | AU  | 43           | 43  | 100  | 0.02  | 0.34           | 0.99    | -1.26 |
|           | Surface Temperature | WI  | 23           | 23  | 82   | -0.04 | 0.55           | 1.02    | 0.62  |
|           |                     | SP  | 22           | 13  | 57   | 0.90  | 0.94           | 0.31    | 0.15  |
|           |                     | SU  | 17           | 9   | 47   | 0.88  | 0.89           | 0.34    | 0.10  |
|           |                     | AU  | 26           | 13  | 57   | 0.88  | 0.89           | 0.34    | 0.21  |
|           | Bottom Temperature  | WI  | 23           | 23  | 82   | 0.12  | 0.40           | 0.94    | 1.25  |
|           |                     | SP  | 22           | 13  | 57   | -0.02 | 0.28           | 1.01    | 0.84  |
|           |                     | SU  | 17           | 9   | 46   | 0.86  | 0.87           | 0.38    | -0.18 |
|           |                     | AU  | 26           | 13  | 48   | 0.16  | 0.42           | 0.92    | 0.10  |

### Text S1: Inflow-outflow linear regression for Wupper Reservoir (Germany)

For each simulation at Wupper Reservoir (Germany), a linear regression was trained to obtain the best possible linear model to predict outflow from inflow. For Lake pseudo-observations, i.e., when models were forced with ERA5 meteorological data, over the training (1994-2016) and validation (2017-2019) periods the linear model had performance measures as follow:

Training period – Nash-Sutcliffe efficiency: 0.67 and Kling-Gupta efficiency: 0.79

Validation period – Nash-Sutcliffe efficiency: 0.78 and Kling-Gupta efficiency 0.82

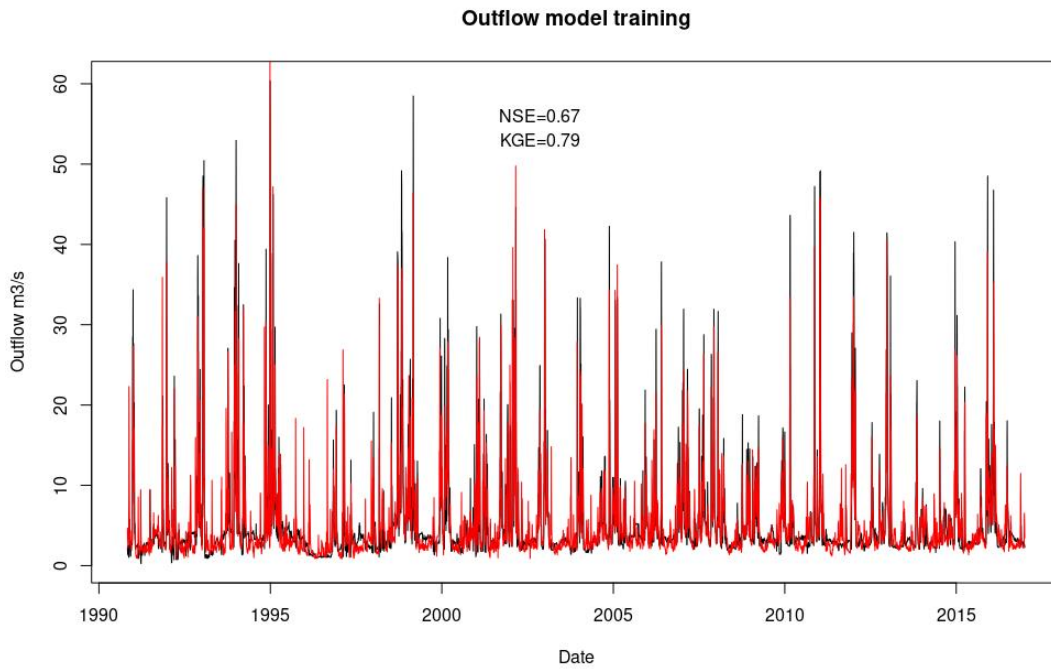

Figure S1: Comparison of modeled (red) and observed (black) outflow over the model training period.

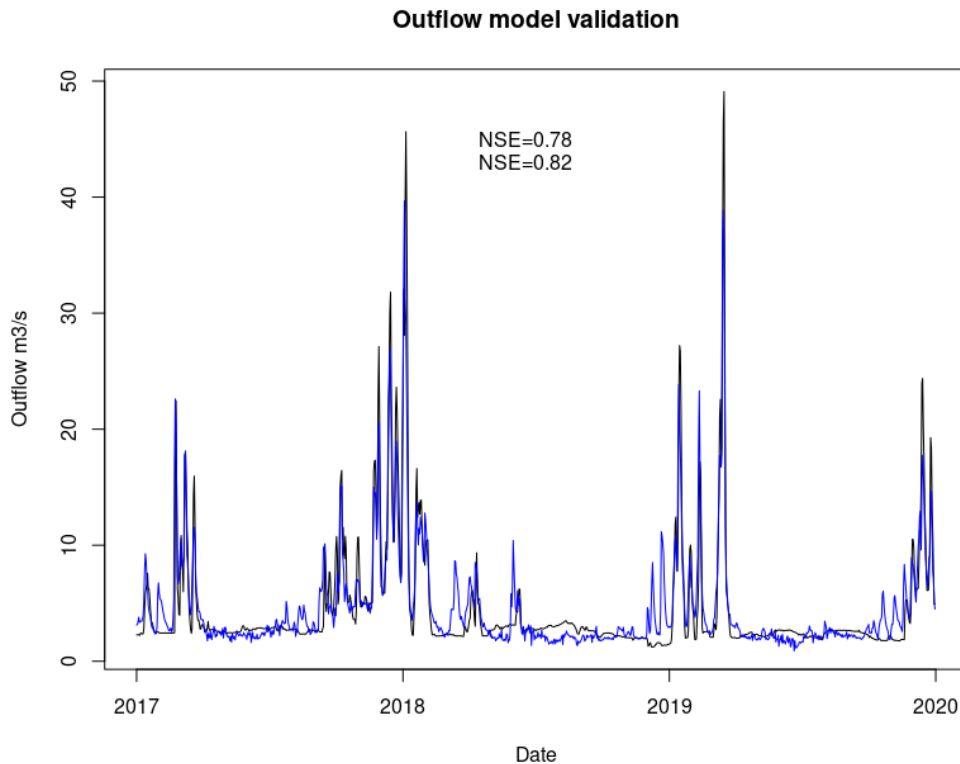

Figure S2: Comparison of modeled (blue) and observed (black) outflow over the model validation period.

## Text S2: Validation of inflow water temperature model at Wupper Reservoir (Germany)

The linear model of the form  $(A + B \cdot \text{AirTemperature})$  used to predict inflow water temperature at Wupper Reservoir was validated against observation over 2004-2014 (Figure S3) with performance measures as follow: Nash-Sutcliffe efficiency: 0.97, Kling-Gupta efficiency: 0.79 and Pearson's correlation of 0.98.

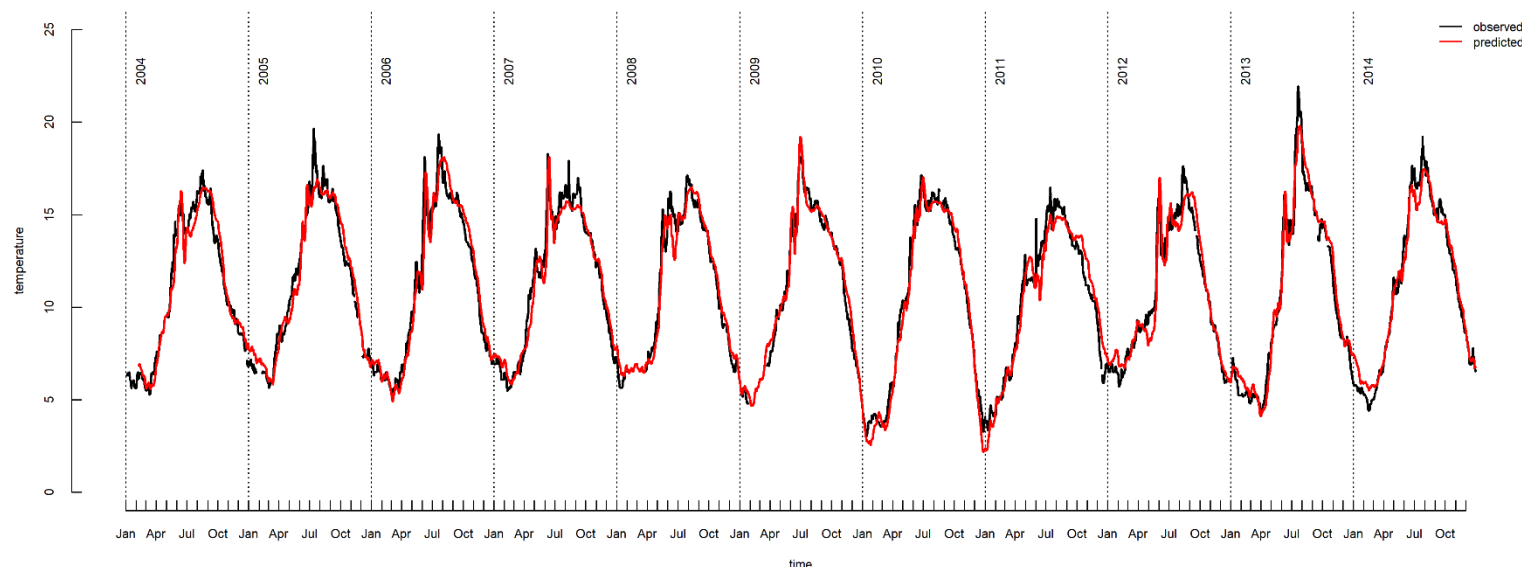

Figure S3: Comparison of modelled and observed inflow temperature and residuals.

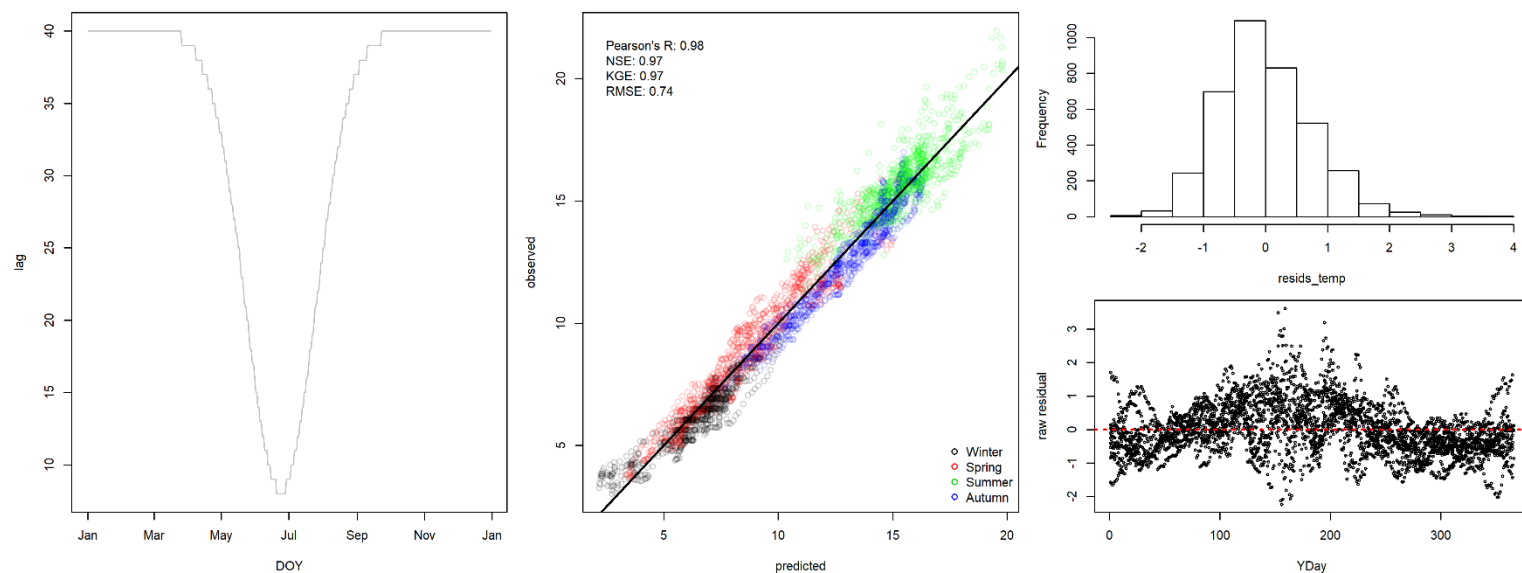

Text S3: Lake seasonal heat budget at the four case studies.

The lake energy budget includes exchanges through the air-water interface, i.e., downward short-wave radiation, downward and upward long-wave radiation, latent and sensible heat fluxes, and by lateral fluxes of water, i.e., inflow and outflow of water (Schmid & Read, 2022). The energy fluxes at the air-water interface were calculated with the HeatFluxAnalyzer (Woolway et al., 2015). The net heat flux  $H_F$  ( $W m^{-2}$ ) caused by an inflow with discharge  $Q_{in}$  and temperature  $T_{in}$  is given by Livingstone & Imboden (1989):

$$H_F = \frac{C_p \rho}{A} Q_{in} (T_{in} - T_{Lake})$$

where  $C_p$  and  $\rho$  are the heat capacity and density of water, respectively; and  $T_{Lake}$  is the outflow temperature, which is assumed to be the lake surface temperature (Schmid and Read 2022).

Table S3 below displays the contribution of each heat flux to the total heat fluxes for each case-study and each season.

**Table S3: Contributions (%) of each discrete heat flux to the total lake heat fluxes at each case study by season.**

|                                |             | Spring<br>Mar-May | Summer<br>Jun-Aug | Autumn<br>Sep-Nov | Winter<br>Dec-Feb |
|--------------------------------|-------------|-------------------|-------------------|-------------------|-------------------|
| Lake Vansjø<br>Norway          | Short-wave  | 77                | 60                | 56                | 30                |
|                                | Long-wave   | 8                 | 9                 | 10                | 18                |
|                                | Latent      | 13                | 21                | 23                | 18                |
|                                | Sensible    | 2                 | 5                 | 7                 | 17                |
|                                | Throughflow | 0                 | 5                 | 4                 | 17                |
| Sau Reservoir<br>Spain         | Short-wave  | 62                | 66                | 47                | 42                |
|                                | Long-wave   | 22                | 23                | 31                | 38                |
|                                | Latent      | 5                 | 8                 | 12                | 8                 |
|                                | Sensible    | 1                 | 1                 | 4                 | 4                 |
|                                | Throughflow | 10                | 2                 | 6                 | 7                 |
| Wupper Reservoir<br>Germany    | Short-wave  | 55                | 45                | 34                | 25                |
|                                | Long-wave   | 25                | 21                | 28                | 35                |
|                                | Latent      | 14                | 19                | 20                | 10                |
|                                | Sensible    | 4                 | 6                 | 8                 | 5                 |
|                                | Throughflow | 2                 | 9                 | 10                | 25                |
| Mt Bold Reservoir<br>Australia | Short-wave  | 50                | 44                | 60                | 54                |
|                                | Long-wave   | 22                | 25                | 20                | 15                |
|                                | Latent      | 20                | 13                | 17                | 23                |
|                                | Sensible    | 5                 | 2                 | 3                 | 5                 |
|                                | Throughflow | 3                 | 16                | 0                 | 2                 |

## **References:**

Livingstone, D. M., & Imboden, D. M. (1989). Annual heat balance and equilibrium temperature of Lake Aegeri, Switzerland. *Aquatic Sciences*, 51(4), 351–369.

<https://doi.org/10.1007/BF00877177>

Schmid, M., & Read, J. (2022). Heat Budget of Lakes. In T. Mehner & K. Tockner (Eds.), *Encyclopedia of Inland Waters (Second Edition)* (pp. 467–473). Elsevier.

<https://doi.org/10.1016/B978-0-12-819166-8.00011-6>

Woolway, R. I., Jones, I. D., Hamilton, D. P., Maberly, S. C., Muraoka, K., Read, J. S., Smyth, R. L., & Winslow, L. A. (2015). Automated calculation of surface energy fluxes with high-frequency lake buoy data. *Environmental Modelling & Software*, 70, 191–198.

<https://doi.org/10.1016/j.envsoft.2015.04.013>
